# Supplementary material for: CO2-laser-induced carbonization of calcium chloride-treated chitin nanopaper for applications in solar thermal heating
Source: Royal Society of Chemistry journal article supplement (doi:10.1039/d3ra03373b), 2023-01-01
Supplement: d3ra03373b1.pdf [file d3ra03373b1.pdf]

1 Supporting Information

2           CO<sub>2</sub>-laser-induced carbonization of calcium  
3 chloride-treated chitin nanopaper for applications in  
4                           solar thermal heating

5     *Thanakorn Yeamsuksawat, Luting Zhu, Takaaki Kasuga, Masaya Nogi, and Hirotaka Koga\**

6

7           SANKEN (The Institute of Scientific and Industrial Research), Osaka University, 8-1  
8                           Mihogaoka, Ibaraki, Osaka 567-0047, Japan

9

10 \*Corresponding Author

11 Hirotaka Koga, E-mail: [hkoga@eco.sanken.osaka-u.ac.jp](mailto:hkoga@eco.sanken.osaka-u.ac.jp)

12

### 13 Supporting Figures

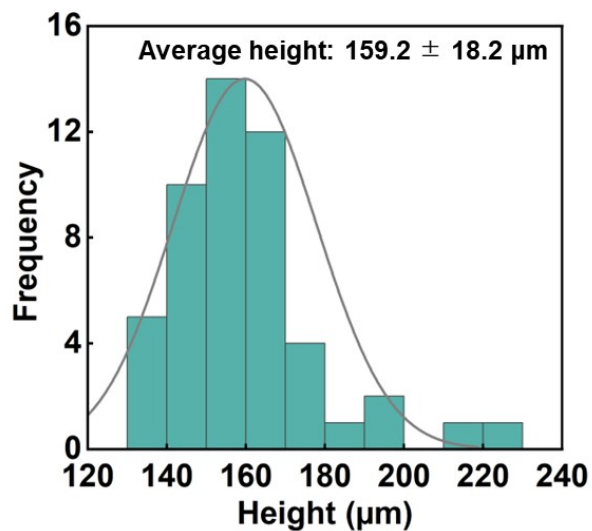

14

15 **Figure S1.** Height distribution histogram of the CO<sub>2</sub>-laser-carbonized layer.

16

17 A height distribution histogram of the CO<sub>2</sub>-laser-carbonized layer was obtained from the cross-  
18 sectional FE-SEM image of the CO<sub>2</sub>-laser-carbonized chitin nanopaper (**Figure 4d**). The average  
19 height of the CO<sub>2</sub>-laser-carbonized layer was calculated to be  $159.2 \pm 18.2 \mu\text{m}$ .

20

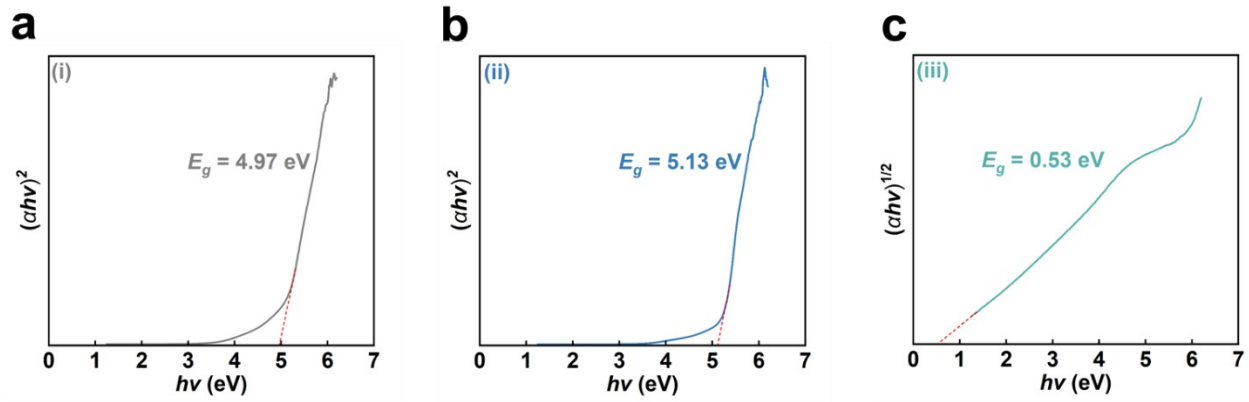

21

22 **Figure S2.** Tauc plots and estimated optical bandgap values of the (a) original chitin nanopaper,  
 23 (b)  $\text{CaCl}_2$ -treated chitin nanopaper, and (c)  $\text{CO}_2$ -laser-carbonized chitin nanopaper.

24

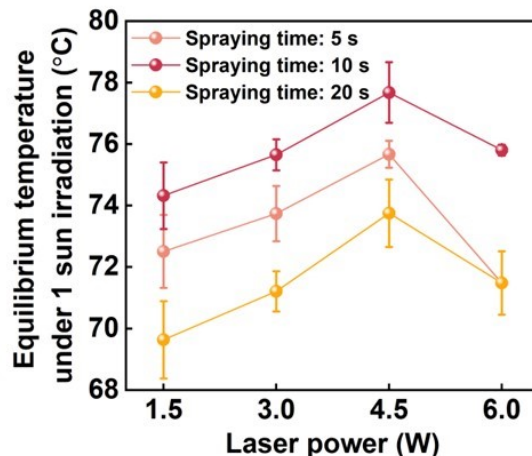

25

26 **Figure S3.** Equilibrium surface temperature under 1 sun irradiation of CO<sub>2</sub>-laser-carbonized chitin  
 27 nanopaper prepared with different spraying times of 25 wt% CaCl<sub>2</sub>/ethanol solution and different  
 28 CO<sub>2</sub> laser powers.

29

30 The effects of the CaCl<sub>2</sub> pretreatment time (spraying time of the 25 wt% CaCl<sub>2</sub>/ethanol solution)  
 31 and CO<sub>2</sub> laser power on the solar thermal heating performance of the CO<sub>2</sub>-laser-carbonized chitin  
 32 nanopaper were investigated (**Figure S3**). The CO<sub>2</sub>-laser-carbonized chitin nanopaper prepared  
 33 with a CaCl<sub>2</sub> pretreatment time of 10 s exhibited a higher surface temperature (i.e., higher solar  
 34 thermal heating performance) than those prepared with CaCl<sub>2</sub> pretreatment times of 5 and 20 s,  
 35 regardless of the examined laser power (1.5, 3.0, 4.5, or 6.0 W). Hence, the optimal CaCl<sub>2</sub>  
 36 pretreatment time for providing the best solar thermal heating performance was determined to be  
 37 10 s. This is possibly because CaCl<sub>2</sub> pretreatment for 10 s can balance the combustion inhibition  
 38 during carbonization and the surface exposure of the carbonized layer. Regardless of the CaCl<sub>2</sub>  
 39 pretreatment time, the solar thermal heating performance of the CO<sub>2</sub>-laser-carbonized chitin  
 40 nanopaper was increased with increasing laser power from 1.5 to 4.5 W, while the solar thermal  
 41 heating performance was decreased with increasing laser power from 4.5 to 6.0 W. Hence, the  
 42 optimum laser power was considered as 4.5 W. This is possibly because a laser power of 4.5 W  
 43 can balance the progress of carbonization and the suppression of combustion.
